# Supplementary material
Source: MDPI journal article supplement (https://www.mdpi.com/2311-7524/7/9/308)
Supplement: s1 [file s1]

| <b>Table S1</b><br><b>Weather Data for the Alson H. Smith Jr. Agricultural Research and Extension Center in Winchester, Virginia (April 1 to April 30, 2019) <sup>z</sup></b> |                       |                              |                   |
|-------------------------------------------------------------------------------------------------------------------------------------------------------------------------------|-----------------------|------------------------------|-------------------|
| Date                                                                                                                                                                          | Average Air Temp (°F) | Total Precipitation (Inches) | Relative Humidity |
| 04/01/2019                                                                                                                                                                    | 36.0                  | 0.00                         | 0                 |
| 04/02/2019                                                                                                                                                                    | 38.7                  | 0.00                         | 0                 |
| 04/03/2019                                                                                                                                                                    | 50.3                  | 0.02                         | 0                 |
| 04/04/2019                                                                                                                                                                    | 54.4                  | 0.00                         | 0                 |
| 04/05/2019                                                                                                                                                                    | 43.0                  | 0.52                         | 18                |
| 04/06/2019                                                                                                                                                                    | 50.9                  | 0.00                         | 12                |
| 04/07/2019                                                                                                                                                                    | 60.1                  | 0.03                         | 1                 |
| 04/08/2019                                                                                                                                                                    | 65.6                  | 0.10                         | 6                 |
| 04/09/2019                                                                                                                                                                    | 64.8                  | 0.00                         | 1                 |
| 04/10/2019                                                                                                                                                                    | 57.0                  | 0.00                         | 0                 |
| 04/11/2019                                                                                                                                                                    | 51.5                  | 0.00                         | 0                 |
| 04/12/2019                                                                                                                                                                    | 56.6                  | 0.47                         | 15                |
| 04/13/2019                                                                                                                                                                    | 64.8                  | 0.30                         | 9                 |
| 04/14/2019                                                                                                                                                                    | 62.3                  | 0.27                         | 10                |
| 04/15/2019                                                                                                                                                                    | 49.7                  | 0.27                         | 1                 |
| 04/16/2019                                                                                                                                                                    | 56.0                  | 0.00                         | 0                 |
| 04/17/2019                                                                                                                                                                    | 61.2                  | 0.00                         | 0                 |
| 04/18/2019                                                                                                                                                                    | 62.2                  | 0.00                         | 3                 |
| 04/19/2019                                                                                                                                                                    | 66.3                  | 1.01                         | 8                 |
| 04/20/2019                                                                                                                                                                    | 62.1                  | 0.00                         | 8                 |
| 04/21/2019                                                                                                                                                                    | 53.7                  | 0.00                         | 1                 |
| 04/22/2019                                                                                                                                                                    | 58.5                  | 0.00                         | 0                 |
| 04/23/2019                                                                                                                                                                    | 67.9                  | 0.00                         | 0                 |

|                            |      |      |     |
|----------------------------|------|------|-----|
| 04/24/2019                 | 66.3 | 0.00 | 0   |
| 04/25/2019                 | 61.5 | 0.10 | 2   |
| 04/26/2019                 | 58.1 | 0.06 | 10  |
| 04/27/2019                 | 56.6 | 0.03 | 0   |
| 04/28/2019                 | 53.1 | 0.13 | 8   |
| 04/29/2019                 | 50.0 | 0.00 | 6   |
| 04/30/2019                 | 64.2 | 0.00 | 0   |
| <b>Monthly<br/>summary</b> | 56.8 | 3.31 | 119 |

<sup>z</sup> Weather data were retrieved from the Cornell University's Network for Environment and Weather Applications (NEWA) webpage (<http://newa.cornell.edu/>).

**Table S2**  
**Weather Data for the Mountain Horticultural Crops Research and**  
**Extension Center in Mills River, North Carolina (April 1 to April 30, 2019) <sup>z</sup>**

| Date       | Average Air Temp (°F) | Total Precipitation (Inches) | Relative Humidity |
|------------|-----------------------|------------------------------|-------------------|
| 04/01/2019 | 39.9                  | 0.00                         | 0                 |
| 04/02/2019 | 42.0                  | 0.00                         | 0                 |
| 04/03/2019 | 47.7                  | 0.00                         | 0                 |
| 04/04/2019 | 55.2                  | 0.00                         | 0                 |
| 04/05/2019 | 51.9                  | 0.53                         | 0                 |
| 04/06/2019 | 58.8                  | 0.00                         | 0                 |
| 04/07/2019 | 60.7                  | 0.02                         | 0                 |
| 04/08/2019 | 61.9                  | 1.21                         | 0                 |
| 04/09/2019 | 59.3                  | 0.06                         | 0                 |
| 04/10/2019 | 61.0                  | 0.00                         | 0                 |
| 04/11/2019 | 62.1                  | 0.00                         | 0                 |
| 04/12/2019 | 64.4                  | 0.34                         | 0                 |
| 04/13/2019 | 64.7                  | 0.01                         | 0                 |
| 04/14/2019 | 63.0                  | 2.11                         | 1                 |
| 04/15/2019 | 51.9                  | 0.00                         | 0                 |
| 04/16/2019 | 55.4                  | 0.00                         | 0                 |
| 04/17/2019 | 63.1                  | 0.00                         | 1                 |
| 04/18/2019 | 66.1                  | 0.00                         | 0                 |
| 04/19/2019 | 58.4                  | 5.37                         | 0                 |
| 04/20/2019 | 44.0                  | 0.01                         | 0                 |
| 04/21/2019 | 48.0                  | 0.00                         | 0                 |
| 04/22/2019 | 58.3                  | 0.00                         | 0                 |
| 04/23/2019 | 64.6                  | 0.00                         | 0                 |

|                            |      |      |   |
|----------------------------|------|------|---|
| 04/24/2019                 | 67.0 | 0.00 | 0 |
| 04/25/2019                 | 62.0 | 0.00 | 0 |
| 04/26/2019                 | 60.5 | 0.03 | 0 |
| 04/27/2019                 | 60.7 | 0.00 | 0 |
| 04/28/2019                 | 67.1 | 0.00 | 0 |
| 04/29/2019                 | 60.2 | 0.00 | 0 |
| 04/30/2019                 | 68.0 | 0.00 | 0 |
| <b>Monthly<br/>summary</b> | 58.3 | 9.69 | 2 |

<sup>z</sup> Weather data were retrieved from the Cornell University's Network for Environment and Weather Applications (NEWA) webpage (<http://newa.cornell.edu/>).
